# Supplementary material for: Human Leukocyte/Endothelial Cell Interactions and Mitochondrial Dysfunction in Type 2 Diabetic Patients and Their Association With Silent Myocardial Ischemia
Source: Oxford University Press journal article supplement (doi:10.2337/dc12-1224), 2013-01-09

## SUPPLEMENTARY DATA

### **Drugs and solutions**

Kits for glucose, insulin, total cholesterol (TC), triglycerides (TG), high density lipoproteins (HDL) and low density lipoproteins (LDL) were purchased from Abbott Laboratories (Abbott Park, IL, USA). Lpa and (hs-CRP) kits were supplied by Beckman Corp (Brea, A, USA). The HbA1c kit was purchased from Menarini Diagnostics (Florence, Italy).

Sodium cyanide, NADH, glucose, trypan blue, arginine, glutathione reductase, NEM, BPDS, H<sub>2</sub>O<sub>2</sub>, haemoglobin, RPMI1640 supplemented with 20 mM HEPES, HBSS and fibronectin were obtained from Sigma-Aldrich (Sigma Chem. Co., St. Louis, MO, USA). Dextran was acquired from Fluka (St. Louis, MO, USA). HBSS was supplied by Cambrex (Verviers, Belgium). DCFH-DA was provided by Calbiochem (San Diego, CA, USA). TMRM was supplied by Molecular Probes (Eugene, OR, USA). Dulbecco's PBS with (DPBS<sup>+</sup>) or without (DPBS<sup>-</sup>) Ca<sup>2+</sup> and Mg<sup>2+</sup>, endothelial cell growth medium culture media and foetal bovine serum were obtained from LONZA (Verviers, Belgium). Recombinant TNF- $\alpha$ , human serum albumin (HSA, Albuminate 25%) and Ficoll-Paque TM Plus were purchased from GE Healthcare (Little Chalfont, Buckinghamshire, UK). Plastic coverslips with a diameter of 25 mm were obtained from Nunc (supplied by Thermo Fisher Scientific). PBS, collagenase, and trypsin-EDTA were obtained from Invitrogen (Eugene, OR, USA).

### ***Determination of glutathione content***

An HPLC method was used to evaluate whole blood (collected in heparinised tubes) for GSH and GSSG. For determination of GSSG, blood samples (0.5 mL) were treated at 4°C with 0.5 mL ice-cold perchloric acid (12%) containing 40x10<sup>-3</sup> mol/L N-ethylmaleimide (NEM) - in order to prevent GSH oxidation - and with 2 mM bathophenanthroline disulfonic acid (BPDS), as described by Asensi et al. (1994) (1). To measure total glutathione, blood (0.5 mL) was treated at 4°C with 0.5 mL trichloroacetic acid (30%). Samples were then centrifuged at 15,000g for 5 min at 4°C and the acidic supernatants were used for measurement of GSH, GSSG and total glutathione.

For GSSG determinations, 0.5 mL of the acidic supernatants were derivatized by adding 50  $\mu$ L of 1 mM  $\gamma$ -glutamyl-glutamate prepared in 0.3% perchloric acid. Afterwards, pH was adjusted to 8.0 with KOH (2 mol/L). Samples were then centrifuged and a 25  $\mu$ L aliquot of the supernatant was mixed with 50  $\mu$ L of 1% 1-fluoro-2,4-dinitrobenzene. Derivatization was subsequently completed in 45 min and desiccated samples were maintained stable at -20°C until injection. This procedure reduces GSH oxidation in blood to about 1%.

### ***Adhesion assay. Levels of cytokines and adhesion molecules***

The parallel plate flow chamber *in-vitro* model has been described in detail previously (2-3). For adhesion assays, coverslips containing confluent HUVEC monolayers were inserted into a circular recess in the bottom plate of the flow chamber (maintained at 37°C), to which a portion (5x25mm) of the endothelial cells were exposed. The entire chamber was mounted on an inverted microscope (Nikon Eclipse TE 2000-S, Amstelveen, The Netherlands) connected to a video camera. Experiments were performed using a 40x objective lens. PMNs were resuspended in Dulbecco's Phosphate-Buffered Saline (DPBS) containing 20x10<sup>-3</sup> mol/L HEPES and 0.1% human serum albumin at 1x10<sup>6</sup> cells/mL and were then drawn across the HUVEC monolayer at a controlled flow rate of 0.36 mL/min (estimated shear stress of 0.7 dyne/cm<sup>2</sup>). A circular glass window in the top plate of the chamber allowed microscopic examination of the monolayer exposed to the flow in real time. Images in a single field of view were recorded over a 5-min period during which leukocyte parameters were determined. Leukocyte rolling was calculated by counting the number of leukocytes rolling over 100  $\mu$ m<sup>2</sup> of the endothelial monolayer during a 1-min period. The velocity of 20 consecutive leukocytes in the field of focus was determined by measuring the time required to travel a distance of 100  $\mu$ m. Adhesion was evaluated by counting the number of PMN that maintained stable contact with the HUVEC for 30 s. Tumoral necrosis factor

## SUPPLEMENTARY DATA

(TNF- $\alpha$ , 10 ng/mL, 4h) and platelet activating factor (PAF, 1  $\mu$ mol/L, 1h) were used as positive controls for HUVEC and leukocytes, respectively. A Luminex 100 flow analyser system was employed to analyse VCAM-1, E-selectin, ICAM-1, IL-6 and TNF- $\alpha$  in serum from controls and diabetic patients (Austin, TX, USA).

1. Asensi M, Sastre J, Pallardo FV, Estrela JM, Viña J. Determination of oxidized glutathione in blood: high-performance liquid chromatography. *Methods Enzymol* 1994;234:367-371.
2. De Pablo C, Orden S, Apostolova N, Blanquer A, Esplugues JV, Alvarez A. Abacavir and didanosine induce the interaction between human leukocytes and endothelial cells through Mac-1 upregulation. *AIDS* 2010; 24:1259-1266.
3. Victor VM, Rocha M, Bañuls C, Alvarez A, de Pablo C, Sanchez-Serrano M, Gomez M, Hernandez-Mijares A. Induction of oxidative stress and human leukocyte/endothelial cell interactions in polycystic ovary syndrome patients with insulin resistance. *J Clin Endocrinol Metab.*2011;96:3115-22.

SUPPLEMENTARY DATA

**Supplementary Table 1.** Correlation coefficient of leukocyte mitochondrial function, ROS (total and mitochondrial) and leukocyte-endothelial interactions in diabetic patients with and without SMI.

|                            | Rolling velocity |         | Rolling flux |         | Adhesion |         | O <sub>2</sub> Consumption |         | ΔΨ <sub>m</sub> |         |
|----------------------------|------------------|---------|--------------|---------|----------|---------|----------------------------|---------|-----------------|---------|
|                            | r                | P value | r            | P value | r        | P value | r                          | P value | r               | P value |
| Without SMI                |                  |         |              |         |          |         |                            |         |                 |         |
| O <sub>2</sub> Consumption | 0.628            | 0.095   | -0.770       | 0.025   | -0.979   | <0.001  | -----                      | -----   | -----           | -----   |
| ΔΨ <sub>m</sub>            | 0.294            | 0.479   | -0.706       | 0.050   | -0.865   | 0.005   | -----                      | -----   | -----           | -----   |
| ROS                        | -0.387           | 0.344   | 0.820        | 0.013   | 0.965    | <0.001  | -0.407                     | 0.011   | 0.128           | 0.358   |
| Mitochondrial ROS          | -0.132           | 0.777   | 0.548        | 0.203   | 0.744    | 0.055   | -0.312                     | 0.060   | -0.115          | 0.491   |
| With SMI                   |                  |         |              |         |          |         |                            |         |                 |         |
| O <sub>2</sub> Consumption | 0.954            | <0.001  | -0.683       | 0.091   | -0.873   | 0.010   | -----                      | -----   | -----           | -----   |
| ΔΨ <sub>m</sub>            | 0.622            | 0.135   | -0.765       | 0.045   | -0.929   | 0.002   | -----                      | -----   | -----           | -----   |
| ROS                        | -0.616           | 0.141   | 0.777        | 0.040   | 0.838    | 0.018   | -0.647                     | 0.006   | -0.156          | 0.563   |
| Mitochondrial ROS          | -0.814           | 0.026   | 0.848        | 0.016   | 0.989    | <0.001  | -0.412                     | 0.071   | -0.468          | 0.037   |

Correlation coefficients were estimated by Pearson's correlation for parametric parameters or Spearman's correlation when data were not normally distributed.

SUPPLEMENTARY DATA

**Supplementary Figure 1.** Effects of tumoral necrosis factor (TNF- $\alpha$ , 10 ng/mL, 4h) and platelet activating factor (PAF, 1  $\mu$ mol/L, 1h) (used as positive controls for HUVEC and leukocytes, respectively) on PMN from control subjects. PMN rolling velocity (microsecond-1) (A), rolling flux (PMN per minute) (B) and PMN adhesion (PMN per square millimetre) (C). Data are expressed as percentage or mean + SEM. \*P<0.05 and \*\*\*P<0.001 when compared by an independent T-test.

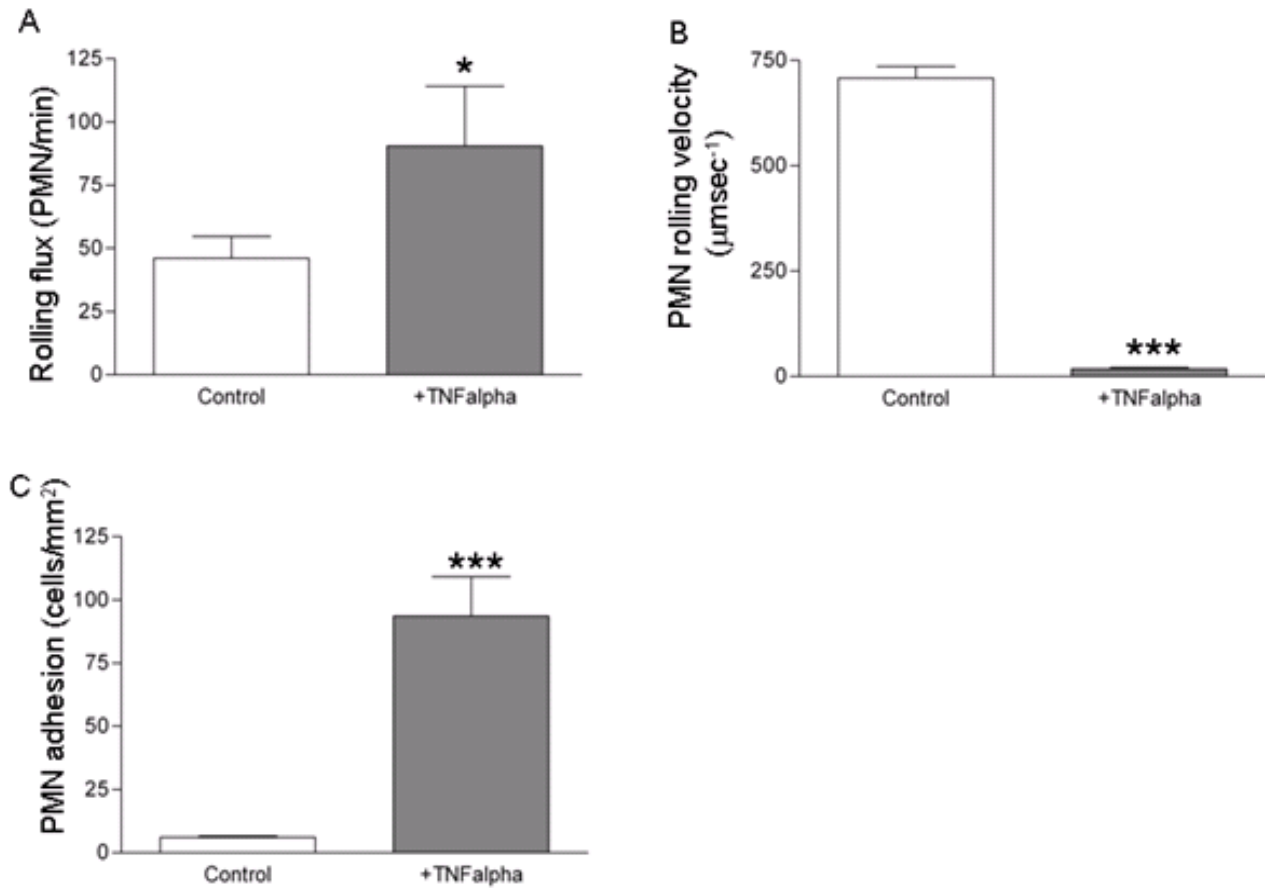

Supplement: dc121224supplementarydata.pdf [file dc121224supplementarydata.pdf]
